# Supplementary material for: Medical Cannabis Increases Appetite but Not Body Weight in Patients with Inflammatory Bowel Diseases
Source: MDPI journal article supplement (doi:10.3390/nu16010078), 2023-12-26
Supplement: s1 [file s1]

Table S1. Comparison of patients according their compliance to MC therapy.

|                                               | Total population<br>(n=88) | High compliance<br>(n=61) | Low compliance <sup>a</sup><br>(n=27) | P     |
|-----------------------------------------------|----------------------------|---------------------------|---------------------------------------|-------|
| Treatment indications %, (n)                  |                            |                           |                                       |       |
| Increase appetite and dietary intake          | 42.5 (37)                  | 39.3 (24)                 | 48.1 (13)                             | 0.477 |
| Other indications                             | 57.9 (51)                  | 60.6 (37)                 | 51.9 (14)                             |       |
| Prescribed cannabis treatment characteristics |                            |                           |                                       |       |
| Treatment dose (gr/month) (mean±sd)           | 23.1±7.5                   | 22.4±6.9                  | 25.0±7.0                              | 0.276 |
| THC dose (gr/month) (mean±sd)                 | 1.7±1.2                    | 1.6±1.1                   | 1.5±0.7                               | 0.771 |
| CBD dose (gr/month) (mean±sd)                 | 2.4±0.9                    | 2.4±0.9                   | 2.5±0.6                               | 0.639 |
| THC/CBD dose ratio (median, range)            | 0.6 (0.03-5.0)             | 0.6 (0.03-5.0)            | 0.7 (0.2-1.25)                        | 0.821 |
| Adverse events %, (n)                         |                            |                           |                                       |       |
| Dizziness                                     | 3.4 (3)                    | 1.7 (1)                   | 7.4 (2)                               | 0.175 |
| Fatigue                                       | 21.8 (19)                  | 23.3 (14)                 | 18.5 (5)                              | 0.615 |
| Confusion                                     | 1.1 (1)                    | 1.7 (1)                   | 0.0 (0)                               | 0.500 |
| Mood lability                                 | 16.1 (14)                  | 15.0 (9)                  | 18.5 (5)                              | 0.679 |
| Palpitations                                  | 5.7 (5)                    | 8.3 (5)                   | 0.0 (0)                               | 0.122 |
| Dry mouth                                     | 23.0 (20)                  | 26.7 (16)                 | 14.8 (4)                              | 0.224 |
| Increased appetite                            | 28.7 (25)                  | 28.3 (17)                 | 29.6 (8)                              | 0.902 |
| Weight gain                                   | 10.3 (9)                   | 8.3 (5)                   | 14.8 (4)                              | 0.358 |
| Previous Cannabis use %, (n)                  | 40.9, (36)                 | 40.9, (25)                | 29.6, (8)                             | 0.150 |

<sup>a</sup> Low compliance to MC therapy was defined as a decrease or discontinuation of MC treatment, according to the patient's own decision; patients with high compliance were those who maintained their prescribed regimen throughout 3 months of follow-up
